# Supplementary material for: Evaluation of Sequence Features from Intrinsically Disordered Regions for the Estimation of Protein Function
Source: PLoS One. 2014 Feb 24;9(2):e89890. doi: 10.1371/journal.pone.0089890 (PMC3933697; doi:10.1371/journal.pone.0089890)
Supplement: Table S4 — MCC values for all features and all GO Slim terms tested along with the number of IDR sequences used for training. (XLSX) [file pone.0089890.s007.xlsx]

## Sheet: all_goslim_mcc
Supporting Table S4. MCC values for all features and all GO Slim terms tested along with the number of IDR sequences used for training
GO Slim term	Name	Chemical composition	AA composition	Composition+ Dubchak features	Occurrence+ Dubchak features	Sequence bigrams	Alternate bigrams	Profile bigrams	Positive training data size
GO:0000003	reproduction	-	0.0142857	0.0396933	0.0351091	0.0145161	0.026841	0.0270982	1187
GO:0000228	nuclear chromosome	-0.00251103	0.0363066	0.0561859	0.0561556	0.0805212	0.0438007	0.0148384	390
GO:0000902	cell morphogenesis	0.0825595	0.0262066	0.0409068	0.0441805	0.047507	0.0473384	0.0312945	818
GO:0000988	protein binding transcription factor activity	-	0.0697114	0.0433568	0.0290045	0.0451674	0.0671201	0.0114559	718
GO:0001071	nucleic acid binding transcription factor activity	-0.00478815	0.14908	0.148189	0.133182	0.189837	0.175188	0.137921	1307
GO:0002376	immune system process	-0.00271205	0.0141818	0.0272182	0.0294544	0.0304959	0.0151985	0.0236035	873
GO:0003013	circulatory system process	-	-0.00964653	0.00183551	0.0137841	0.0206605	0.0212169	-0.00547251	163
GO:0003677	DNA binding	0.0136821	0.0785301	0.117776	0.117729	0.141024	0.121978	0.097732	2531
GO:0003723	RNA binding	0.077371	0.112819	0.116373	0.116834	0.117562	0.0945979	0.101748	845
GO:0003729	mRNA binding	-0.00291628	0.0682996	0.0257315	0.0235268	0.0271281	0.0126921	0.0230539	92
GO:0003735	structural constituent of ribosome	0.038047	-0.00559884	0.0334347	0.0361945	0.0290968	0.0226612	0.0266506	25
GO:0003924	GTPase activity	-0.00131681	0.0388924	0.070992	0.0749623	0.0352236	0.0647631	0.0267961	112
GO:0004386	helicase activity	0.00572964	0.0389994	0.0943049	0.0968412	0.0842537	0.078344	0.0333081	278
GO:0004518	nuclease activity	-	-0.0055561	0.038557	0.0243081	0.043576	0.0218998	0.036372	139
GO:0004871	signal transducer activity	-	0.023142	0.0734223	0.0784975	0.0644843	0.0578888	0.057055	813
GO:0005198	structural molecule activity	0.171142	0.202573	0.112931	0.1334	0.125506	0.116918	0.102358	437
GO:0005576	extracellular region	0.214776	0.266425	0.173509	0.0980686	0.148553	0.163414	0.162217	760
GO:0005578	proteinaceous extracellular matrix	0.288161	0.345526	0.211979	0.102864	0.181658	0.170681	0.221537	317
GO:0005615	extracellular space	0.0492904	0.0937921	0.0440017	0.0247716	0.0553538	0.0484145	0.0282938	296
GO:0005634	nucleus	0.093496	0.107764	0.130937	0.140362	0.144281	0.134363	0.0883693	5739
GO:0005635	nuclear envelope	-0.00138335	0.0777506	0.0223701	0.0140224	0.0326362	0.0466908	0.0284633	240
GO:0005654	nucleoplasm	0.0604218	0.0550963	0.0463711	0.0474109	0.0883438	0.0999661	0.0719443	1797
GO:0005694	chromosome	0.0144468	0.069115	0.0896512	0.0780417	0.0853035	0.0815951	0.0461314	765
GO:0005730	nucleolus	0.0380957	0.0642019	0.103728	0.0964503	0.0739038	0.067501	0.0706892	672
GO:0005739	mitochondrion	-	0.0118887	0.0129412	0.0147038	0.0424692	0.0543632	0.044035	559
GO:0005764	lysosome	-	0.00129154	0.00886053	0.0204349	0.010216	0.0137306	-0.0100689	136
GO:0005768	endosome	-	-0.00703313	0.0370255	0.0404207	0.0248419	0.0431744	0.0290609	368
GO:0005773	vacuole	-	-0.00408768	0.0152053	0.017254	0.0370446	0.0395396	0.00548348	175
GO:0005777	peroxisome	-	-0.00332846	0.00927718	0.000213282	0.0149078	0.0121155	-0.00973361	37
GO:0005783	endoplasmic reticulum	0.16883	0.137279	0.0702231	0.0440402	0.0839414	0.0962369	0.0721128	632
GO:0005794	Golgi apparatus	-	0.0038189	0.0267052	0.0255552	0.0274811	0.0235036	0.0360404	769
GO:0005811	lipid particle	-	0.0179963	0.00761402	-0.00728872	0.0026734	-0.000451642	-0.00922085	23
GO:0005815	microtubule organizing center	-	0.0312388	0.0431992	0.0455427	0.00164852	0.0189673	0.0153265	494
GO:0005829	cytosol	-0.00393755	-0.0158702	0.00871393	0.0218622	0.0294488	0.0503343	0.0106909	1691
GO:0005840	ribosome	0.029894	0.00960333	0.0541212	0.0484325	0.00978347	0.0120155	-0.00758767	56
GO:0005856	cytoskeleton	-	0.00387062	0.0502574	0.0361487	0.0375094	0.0321822	0.050653	1849
GO:0005886	plasma membrane	-	0.0334827	0.0551633	0.0854078	0.0961262	0.102485	0.0675679	2489
GO:0005929	cilium	-0.00119478	-0.00521209	0.0238208	0.0232144	0.0113038	0.00910428	0.00193777	182
GO:0005975	carbohydrate metabolic process	-	0.0501243	0.0372934	0.0310369	0.0554816	0.0432501	0.0184843	292
GO:0006091	generation of precursor metabolites and energy	-	-0.00850216	0.000790243	-0.00511753	-0.0135874	0.00800515	0.000544075	136
GO:0006259	DNA metabolic process	0.0132444	0.0650498	0.105446	0.0946322	0.0989583	0.0810764	0.0400392	791
GO:0006397	mRNA processing	0.177989	0.18861	0.139451	0.146017	0.176224	0.152313	0.0437139	456
GO:0006399	tRNA metabolic process	-0.000885428	-0.0065066	0.0764505	0.0621918	0.0465417	0.0529015	0.018997	56
GO:0006412	translation	-0.00195644	0.0140077	0.0411274	0.0320311	0.0428369	0.0265032	0.0351093	229
GO:0006457	protein folding	0.0359395	0.00962227	0.076596	0.0578342	0.0105591	0.0322577	0.00634811	109
GO:0006461	protein complex assembly	-	-0.00550271	0.0105352	-0.00565159	-0.00612403	0.0132955	0.0113616	518
GO:0006464	cellular protein modification process	-	0.00699474	0.0324731	0.023541	0.0358671	0.0222344	0.0298204	1754
GO:0006520	cellular amino acid metabolic process	-	-0.00617734	0.0178812	0.0151004	0.0426163	0.0515244	0.0116759	76
GO:0006605	protein targeting	0.0260911	-0.00244129	0.0106331	0.0191167	0.0170019	0.0185716	0.0181989	241
GO:0006629	lipid metabolic process	-	0.00758811	0.02162	0.00212121	0.0234084	0.0189104	0.0283547	472
GO:0006790	sulfur compound metabolic process	-	-0.00736264	-0.00349243	0.00771445	0.0113784	0.025673	-0.00573462	60
GO:0006810	transport	-	0.0388629	0.070975	0.0648761	0.0364558	0.00703079	0.0473686	2214
GO:0006913	nucleocytoplasmic transport	0.00785582	0.087962	0.0489909	0.0559871	0.0808715	0.0683025	0.0346114	264
GO:0006950	response to stress	-	0.0178155	0.04148	0.0306707	0.0436959	0.0486686	0.0442709	1875
GO:0007005	mitochondrion organization	0.0246732	-0.00336671	-7.45584e-05	0.00908696	0.0536422	0.0337839	0.0305726	105
GO:0007009	plasma membrane organization	-0.000626064	-0.0056546	0.0257398	0.0192	0.0377811	0.0247597	-0.00259743	52
GO:0007010	cytoskeleton organization	-	-0.00106341	0.0307247	0.0204072	0.0435491	0.0146225	0.037265	940
GO:0007034	vacuolar transport	-	0.0146014	-0.00478568	-6.82382e-05	0.00721044	-0.010473	0.00878403	35
GO:0007049	cell cycle	-0.0084454	0.0709383	0.0750349	0.0732428	0.0758484	0.0776332	0.0489001	1176
GO:0007059	chromosome segregation	-0.0011606	0.0221713	0.0386311	0.0316506	0.00941503	0.0288193	0.0253549	172
GO:0007067	mitosis	-	0.0174231	0.0542269	0.0631054	0.0332276	0.0469697	0.0499024	339
GO:0007155	cell adhesion	0.0111447	0.087489	0.0756748	0.0272641	0.0324995	0.0342848	0.0492956	516
GO:0007165	signal transduction	-	0.0448591	0.0786141	0.0728319	0.0724617	0.0741105	0.0757804	2985
GO:0007267	cell-cell signaling	-	-0.00688111	0.0447667	0.0232104	0.0145126	-0.00209494	0.0231986	689
GO:0007568	aging	-0.00257698	0.00845745	0.0268534	0.0217989	0.0138397	0.00729836	0.00199133	143
GO:0008092	cytoskeletal protein binding	-	0.0341893	0.0293959	0.0267438	0.0427353	0.0269195	0.0307577	785
GO:0008134	transcription factor binding	-0.0021037	0.00411334	0.0272218	0.0268867	0.0726991	0.0794927	0.0561724	540
GO:0008135	translation factor activity, nucleic acid binding	-0.000885428	0.0204103	0.0417409	0.0539676	0.00981167	0.0181444	0.00916105	54
GO:0008168	methyltransferase activity	-0.00257698	-0.00706954	0.0568957	0.0411833	0.0242948	0.0200639	-0.0211968	146
GO:0008219	cell death	0.00651539	0.0219981	0.00901508	0.00279282	0.00260212	-0.0139136	-0.00704776	849
GO:0008233	peptidase activity	-	0.157252	0.0767343	0.0290669	0.0259764	0.00997322	0.0313561	258
GO:0008283	cell proliferation	-	-0.0137906	0.0299684	0.0301914	0.0318268	0.0378097	0.0234713	556
GO:0008289	lipid binding	-	0.00318917	0.0747747	0.0698317	0.0455563	0.0551598	0.020529	683
GO:0008565	protein transporter activity	-0.00096955	0.0436752	0.0148147	0.0217299	0.0320552	0.0152799	0.0115283	49
GO:0009056	catabolic process	-0.00676792	0.00875931	0.0330205	0.024299	0.0440629	0.0382166	0.0238526	901
GO:0009058	biosynthetic process	0.0298362	0.0346458	0.0489485	0.0422377	0.0773753	0.0685186	0.0196259	3036
GO:0009790	embryo development	-	0.0674414	0.118787	0.103594	0.114089	0.118052	0.0989299	1009
GO:0016023	cytoplasmic membrane-bounded vesicle	-0.00218428	0.00214353	0.00583123	0.00101388	0.0207707	0.0279187	0.0223766	581
GO:0016192	vesicle-mediated transport	-	0.012612	0.030892	0.0275815	0.0332566	0.0282037	0.0332341	668
GO:0016301	kinase activity	-	-0.00442917	0.0622386	0.0741286	0.0403593	0.0393259	0.0398554	783
GO:0016491	oxidoreductase activity	-0.0011606	-0.00814149	-0.00735937	0.00358766	0.0132754	0.0202837	0.0185724	179
GO:0016746	transferase activity, transferring acyl groups	-0.00225119	-0.001168	0.0299369	0.0229328	0.0311219	0.00235	0.0242951	168
GO:0016757	transferase activity, transferring glycosyl groups	-	0.0139554	-0.00161758	0.00402054	0.0332907	0.023015	-0.0037588	65
GO:0016779	nucleotidyltransferase activity	-0.00354926	-0.0085092	0.0208032	0.0255086	0.0114497	-0.0115177	0.0214164	84
GO:0016791	phosphatase activity	-	-0.00126055	0.0212094	0.016822	0.0354105	0.0382117	0.0167173	208
GO:0016798	hydrolase activity, acting on glycosyl bonds	-	-0.00274461	-0.0134147	-0.0168771	0.00646375	-0.0097617	0.0123373	34
GO:0016810	hydrolase activity, acting on carbon-nitrogen (but not peptide) bonds	-	-0.00301792	0.0100477	1.31535e-05	0.00889531	-2.12817e-05	0.00896965	42
GO:0016829	lyase activity	-	-0.00543969	0.0209743	0.0490578	0.0106125	-0.0155524	-0.00951489	52
GO:0016853	isomerase activity	-0.00296636	-0.00604517	0.00728479	0.0183439	0.0162446	0.0408348	0.0133198	29
GO:0016874	ligase activity	-0.0017035	-0.0024046	0.0310477	0.0384501	0.0491734	0.00102224	0.00426187	366
GO:0016887	ATPase activity	0.0398346	0.0458557	0.100201	0.0996837	0.0918132	0.0979644	0.056463	400
GO:0019843	rRNA binding	-0.00183614	-0.00411775	-0.00763406	-0.00798832	0.0371431	0.0187734	0.0304647	13
GO:0019899	enzyme binding	-	-0.0101915	0.0186114	0.0148972	0.0317289	0.039804	0.0463856	1194
GO:0021700	developmental maturation	-0.00469133	-0.0107598	0.0317571	0.0370081	0.0524264	0.0420799	0.0121042	237
GO:0022607	cellular component assembly	-0.00781857	0.00467042	0.0398342	0.0344549	0.0110875	0.00478156	0.0100993	1176
GO:0022618	ribonucleoprotein complex assembly	0.000101114	0.127303	0.0783927	0.0660706	0.0631234	0.0615923	0.0473261	101
GO:0022857	transmembrane transporter activity	-	0.029043	0.0899887	0.0974167	0.0580627	0.0569644	0.0248478	647
GO:0030154	cell differentiation	0.0296549	0.0654404	0.109284	0.0905672	0.0929801	0.0795191	0.0914288	2444
GO:0030198	extracellular matrix organization	0.302105	0.210459	0.120863	0.130708	0.219645	0.20442	0.120641	176
GO:0030234	enzyme regulator activity	-	-0.00842159	0.0776712	0.0521155	0.0166165	0.0157101	0.0231339	930
GO:0030312	external encapsulating structure	-	-0.00272095	-0.00841724	0.00717812	0.0244838	0.022519	0.00100823	18
GO:0030674	protein binding, bridging	-0.00275737	0.00644335	0.0272602	0.0329026	0.0560192	0.0399008	0.0390904	166
GO:0030705	cytoskeleton-dependent intracellular transport	-0.00165818	0.0041226	0.017231	0.025695	0.0880886	0.0486256	0.0197586	73
GO:0032182	small conjugating protein binding	-	-0.00690772	0.0203411	0.0256966	0.0216577	0.0359542	0.0131309	90
GO:0034330	cell junction organization	-	0.00547075	0.0351847	0.0349716	0.0125142	0.0407599	0.0111987	213
GO:0034641	cellular nitrogen compound metabolic process	0.0957857	0.0936474	0.0790667	0.0794757	0.114498	0.106981	0.0560738	3785
GO:0034655	nucleobase-containing compound catabolic process	0.0568223	0.0624558	0.0978203	0.0952012	0.0714075	0.0825586	0.0287381	344
GO:0040007	growth	-	0.0216491	0.0087767	0.0171693	0.0229679	0.0212109	0.00934894	353
GO:0040011	locomotion	0.0357041	0.035924	0.0492146	0.0471612	0.0357175	0.0458191	0.0575021	889
GO:0042254	ribosome biogenesis	0.0344326	0.0668907	0.113132	0.106291	0.0840999	0.0794383	0.0596537	121
GO:0042393	histone binding	-0.00735296	0.0795891	0.0816326	0.0587269	0.0709118	0.0683673	0.0332744	174
GO:0042592	homeostatic process	-	0.000998606	0.0135656	-0.00142132	0.0154389	0.00737391	0.0162074	840
GO:0043167	ion binding	-	0.0664044	0.0600387	0.0687182	0.0465841	0.0492658	0.0497035	4274
GO:0043234	protein complex	0.0113577	0.0179652	0.0401377	0.033165	0.0433676	0.0596373	0.0374737	2856
GO:0043473	pigmentation	-	-0.00566082	0.00888018	0.00631332	0.00936301	0.00461704	0.00577119	78
GO:0044281	small molecule metabolic process	-0.00644395	0.020463	0.0624395	0.0688271	0.030068	0.0540491	0.0512487	854
GO:0044403	symbiosis, encompassing mutualism through parasitism	-0.00237444	0.0101822	0.0158424	0.00583234	-0.00398438	0.00122049	0.00493796	350
GO:0048646	anatomical structure formation involved in morphogenesis	0.0399532	0.0792901	0.0963151	0.0735155	0.101821	0.0995641	0.0847958	1491
GO:0048856	anatomical structure development	0.0706375	0.113295	0.123589	0.11647	0.131748	0.120473	0.10998	3497
GO:0048870	cell motility	-	0.0178487	0.0298262	0.0343881	0.0370013	0.0216766	0.0412103	577
GO:0050877	neurological system process	-0.00555877	-0.00708061	0.0298147	0.0323872	0.0320576	0.0234827	0.0357557	914
GO:0051082	unfolded protein binding	0.0821633	0.0825583	0.0890245	0.0798037	0.0482768	0.0392674	0.0232783	67
GO:0051186	cofactor metabolic process	-0.000626064	0.0122276	-0.00834296	-0.00664714	-0.00778241	-0.0194235	-0.0039239	53
GO:0051276	chromosome organization	0.024476	0.0841189	0.100063	0.10733	0.0958438	0.0885312	0.0579972	893
GO:0051301	cell division	-	0.0111022	0.0629859	0.0715771	0.0421158	0.0323022	0.0555582	424
GO:0051604	protein maturation	-0.00234386	0.123924	0.0455219	0.0132601	0.0352182	0.0155187	0.041022	52
GO:0055085	transmembrane transport	-	0.0161561	0.0620102	0.0903643	0.0638228	0.064211	0.0428201	681
GO:0061024	membrane organization	-	0.011629	0.00915003	0.0120758	0.0381151	0.0201717	0.0290718	270
GO:0065003	macromolecular complex assembly	0.0658145	0.0136534	0.0234656	0.0129895	0.000331837	0.0114454	0.0169702	706
GO:0071554	cell wall organization or biogenesis	-	-	0.00180692	0.00760852	0.0365186	0.0339522	-0.000671382	16
